# Supplementary material for: Autoimmune Regulator Expression in DC2.4 Cells Regulates the NF-κB Signaling and Cytokine Expression of the Toll-Like Receptor 3 Pathway
Source: PubMed Central journal article supplement (PMC5187802; doi:10.3390/ijms17122002), 2016-12-01
Supplement: ijms-17-02002-s001.pdf [file ijms-17-02002-s001.pdf]

# Supplementary Material: Autoimmune Regulator Expression in DC2.4 Cells Regulates the NF- $\kappa$ B Signaling and Cytokine Expression of the Toll-Like Receptor 3 Pathway

Jitong Sun, Kunwei Niu, Haiying Fu, Haijun Li, Yi Li and Wei Yang

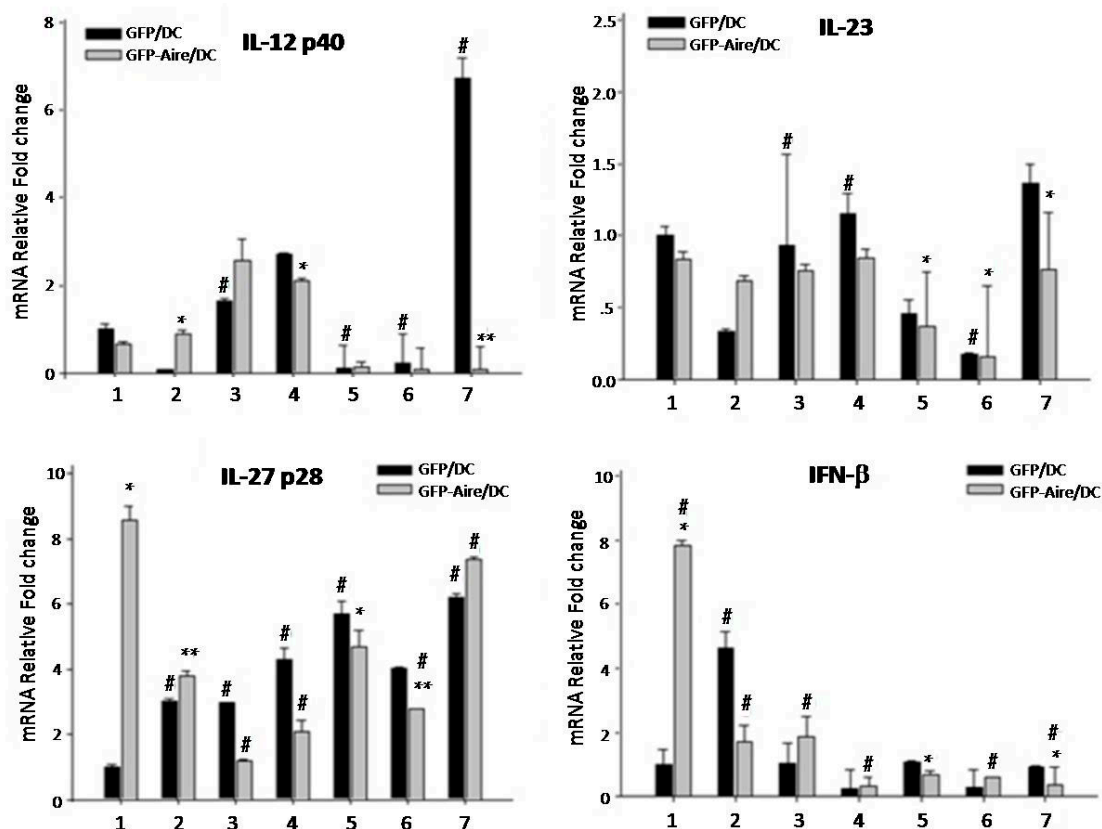

**Figure S1.** Effects of Aire on downstream gene expression in GFP-Aire/DC cells treated with a lower dose of Poly (I:C). The levels of IL-12 p40, IL-23, IL-27 p28, and IFN- $\beta$  transcript expression in GFP-Aire/DC and GFP/DC cells were detected by RT-qPCR. All qPCR data are shown as the gene expression relative to GAPDH expression and are depicted as the fold change relative to GFP/DC cells, which were normalized to 1. *x*-axis: (1): Control; (2,3): 3 h Poly I:C at 1 and 12.5 mg/mL, respectively; (4,5): 6 h Poly I:C at 1 and 12.5 mg/mL, respectively; (6,7): 12 h Poly I:C at 1 and 12.5 mg/mL, respectively. \*  $p < 0.05$ , \*\*  $p < 0.01$  compared with the GFP/DC control; #  $p < 0.05$  compared with the GFP-Aire/DC control.

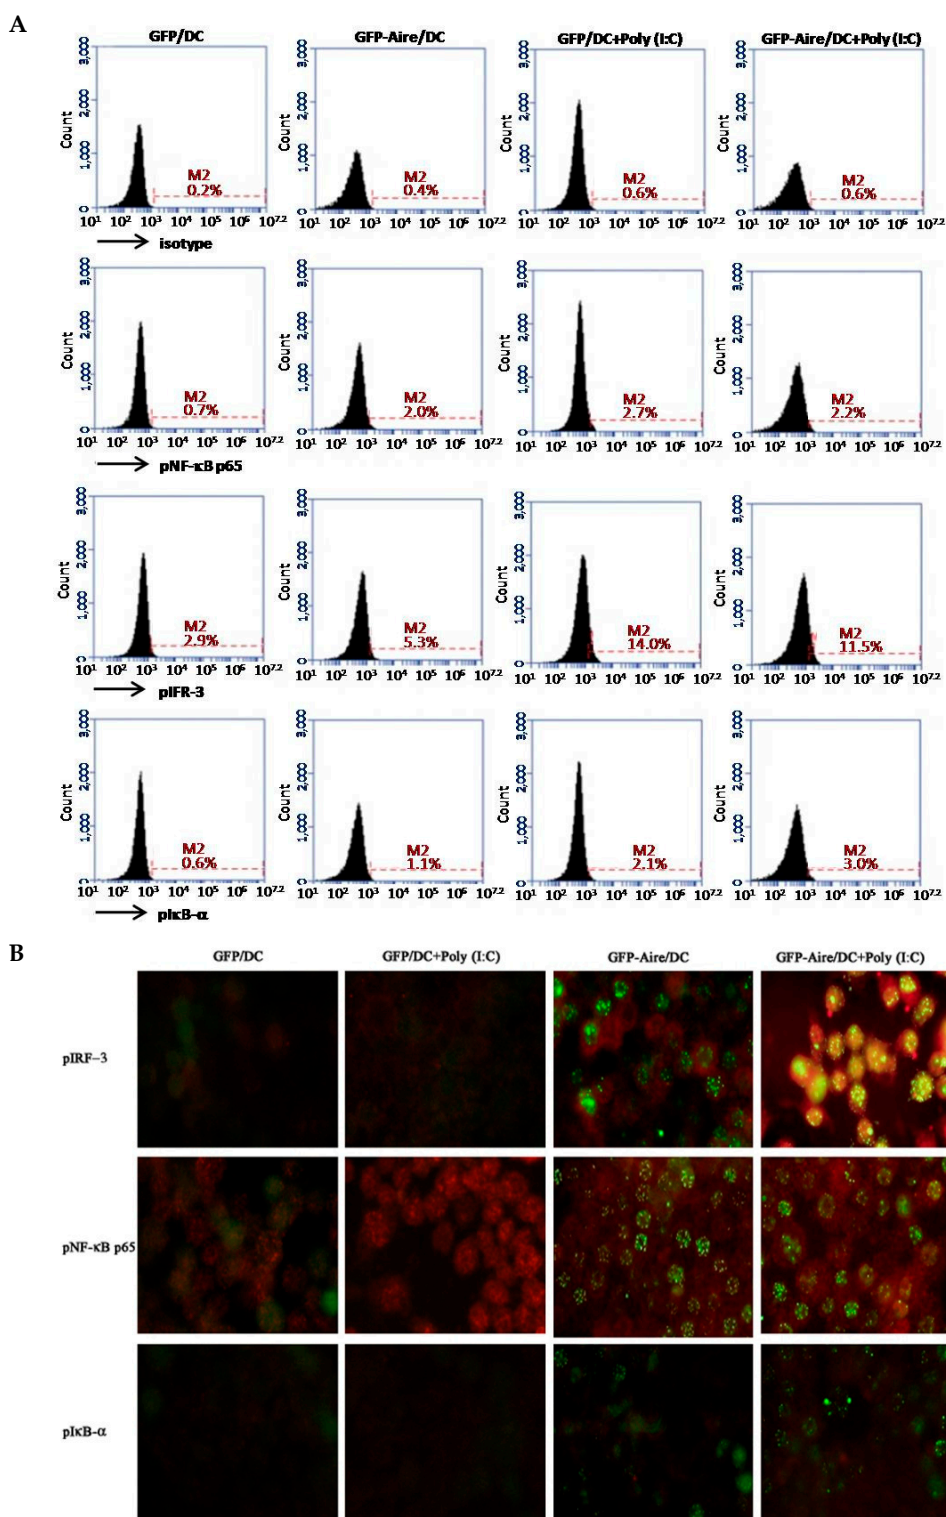

**Figure S2.** (A) Immunofluorescent detection of NF-κB, IRF-3, and IκB-α (red) in GFP/DC and GFP-Aire/DC treated with Poly (I:C) via confocal microscopy. Original magnification: 200×; (B) Phospho-NF-κB, IκB-α, and IRF-3 expression were detected by FCM. The results are representative of at least three independent experiments.

**Table S1.** Oligonucleotide primer sequences.

| Gene                           | Sequences                                                                 | Size (bp) |
|--------------------------------|---------------------------------------------------------------------------|-----------|
| <i>GAPDH</i>                   | S: 5'-GACTTCAACAGCAACTCCCCTC-3'<br>AS: 5'-TAGCCGTATTCATTGTCATACCAG-3'     | 107       |
| <i>TLR1</i>                    | S: 5'-CTGAGGGTCCTGATAATGTCCTAC-3'<br>AS: 5'-GATCACCTTTAGCTCATTGTGGG-3'    | 114       |
| <i>TLR2</i>                    | S: 5'-TTGCGTTACATCTTGGAACCTG-3'<br>AS: 5'-ACTACGCTGACTCCGAGGG-3'          | 96        |
| <i>TLR3</i>                    | S: 5'-CAACGGTTCCTTCTCCTATCTC-3'<br>AS: 5'-TTGCTTAGTAAATGCTCGCTC-3'        | 139       |
| <i>TLR4</i>                    | S: 5'-CTTCATTCAAGACCAAGCCTTTC-3'<br>AS: 5'-AACCGATGGACGTGTAACCAG-3'       | 126       |
| <i>TLR5</i>                    | S: 5'-TCTACAACATATCCACCGAAGACTG-3'<br>AS: 5'-TTATGACTACAAGGGTGATGACGAG-3' | 123       |
| <i>TLR6</i>                    | S: 5'-ACAACATTCCCAGTAGATACCACA-3'<br>AS: 5'-TCCTCATTGACTAAGGCTAACTTC-3'   | 148       |
| <i>TLR7</i>                    | S: 5'-TGAGGGCATTCCCCTAACAC-3'<br>AS: 5'-TCCAGATGGTTCAGCCTACGG-3'          | 96        |
| <i>TLR8</i>                    | S: 5'-TTCCTCACATTCCTTACCACCTC-3'<br>AS: 5'-GTGATAGATAAACCAAACATCCCAG-3'   | 87        |
| <i>TLR9</i>                    | S: 5'-TCTGTCTTACTACACCGCTATTTG-3'<br>AS: 5'-AAACTACCCTTTACAGCCAACC-3'     | 93        |
| <i>IL-12p40</i>                | S: 5'-ACTGGAACACACAAGAACGAGAG-3'<br>AS: 5'-CTTCAAGTCCTCATAGATGCTACCA-3'   | 108       |
| <i>IL-23</i>                   | S: 5'-AAATAATGTGCCCGTATCCAGT-3'<br>AS: 5'-TCCCCTTTGAAGATGTCAGAGTC-3'      | 140       |
| <i>IL-27p28</i>                | S: 5'-CTCTGCTTCCTCGCTACCAC-3'<br>AS: 5'-GGGGCAGCTTCTTTTCTTCT-3'           | 234       |
| <i>IFN-<math>\beta</math></i>  | S: 5'-AAGAGTTACACTGCCTTTGCCATC-3'<br>AS: 5'-CACTGTCTGCTGGTGGAGTTCATC-3'   | 135       |
| <i>MyD88</i>                   | S: 5'-TCCGGCAACTAGAACAGACAGACT-3'<br>AS: 5'-GCCGGCAGACCTTTTCTCAAT-3'      | 119       |
| <i>NF-<math>\kappa</math>B</i> | S: 5'-GGACCTATGAGACCTTCAAGAG-3'<br>AS: 5'-CTACCCGAACTCAACTTCTGT-3'        | 111       |
| <i>TICAM</i>                   | S: 5'-GATGGAGAGGTCCACAAGGA-3'<br>AS: 5'-GAGTGTAGCGTGGGGAGTGT-3'           | 109       |
| <i>IRF-3</i>                   | S: 5'-AGCCTGCATCAAATCAACC-3'<br>AS: 5'-CCACCTTTCTGGCGAAGA-3'              | 180       |
